# Supplementary material
Source: Springer Nature journal article supplement (https://www.springermedizin.de/resource/supplementary/12911_2012_546_MOESM1_ESM.pdf/9526024)
Supplement: MOESM1 [file 9526024]

## Theory

## Website features

## Evidence

Health information model  
(theory of health information –  
seeking behaviour)(27)

- Active information seeking
- Passive information receiving
- Health literacy

Self-efficacy  
(theory of behaviour change)(26):

- Enactive mastery experience
- Physical/affective state
- Cognitive processes
- Motivational processes
- Selection processes
- Verbal persuasion

Search/browse function  
Email notification  
Educational comic strip  
Video-based peer story-  
telling  
Online community  
Goal-setting  
Things I do well  
Blood glucose tracker  
Blood pressure tracker  
Food & activity tracker  
Web-diary  
Email prompts  
Stress management tools  
Communication tools  
Knowledgeable, credible  
source

Systematic review of diabetes-  
related electronic tools(13):

- Living with diabetes(16)
- My Blood Pressure Action  
Plan
- Stop Smoking Centre

Systematic review of  
behaviour change  
websites(17):

- Multiple behaviour change  
tools
- Stress management tools
- Communications skills
